# Supplementary material
Source: MDPI journal article supplement (https://www.mdpi.com/2073-4441/14/14/2277)
Supplement: s1 [file s1]

# Electronic supplementary material

Table S1:Hydrochemical compositions of the groundwater and surface water sources in Kubi and Ocho village during the 2021 sampling campaign. Note: BDL = below detection limit; NM = not measured, ionic concentrations, TDS and DO = mg/L; EC =  $\mu\text{S}/\text{cm}$ ; Temp =  $^{\circ}\text{C}$

| Sample ID | Typology | Well depth | pH   | Temp | EC    | TDS   | DO  | DOC  | Cl <sup>-</sup> | SO <sub>4</sub> <sup>2-</sup> | NO <sub>3</sub> <sup>-</sup> | NO <sub>3</sub> <sup>-</sup> -N | HCO <sub>3</sub> <sup>-</sup> | Na <sup>+</sup> | K <sup>+</sup> | Mg <sup>2+</sup> | Ca <sup>2+</sup> |
|-----------|----------|------------|------|------|-------|-------|-----|------|-----------------|-------------------------------|------------------------------|---------------------------------|-------------------------------|-----------------|----------------|------------------|------------------|
| OKBH      | Borehole | 30         | 7.5  | 19   | 472   | 302.1 | 6.1 | 4.1  | 10.1            | 67.6                          | 56.7                         | 12.9                            | 39.1                          | 28.6            | 0.6            | 14.4             | 35.5             |
| OKR1      | River    |            | 7.9  | 24   | 274   | 175.4 | 9   | 3.8  | 7.4             | 36.8                          | 20.9                         | 4.8                             | 61.2                          | 14.4            | 2.4            | 7.8              | 23.2             |
| OKR2      | River    |            | 8.59 | 24.7 | 206   | 131.9 | 8.3 | 5.3  | 6.4             | 16.8                          | 5.5                          | 1.3                             | 50.6                          | 10.1            | 1.6            | 4.5              | 9.8              |
| OKU1      | Well     | 5.11       | 6.46 | 20.7 | 333   | 213.2 | 3.9 | 11.6 | 7               | 37.7                          | 32.1                         | 7.3                             | 30.2                          | 13.1            | 3.3            | 8.2              | 22.1             |
| OKU2      | Well     | 3.12       | 6.45 | 20.6 | 326   | 208.7 | 8.2 | 13.3 | 8.1             | 50.8                          | 49.2                         | 11.2                            | 14.2                          | 15.5            | 4.1            | 11.4             | 25.4             |
| OKU3      | Well     | 3.78       | 6.51 | 18.3 | 321   | 205.5 | 7.5 | 6    | 7.6             | 74.6                          | 40.8                         | 9.3                             | 28.4                          | 14.8            | 1.4            | 13.9             | 29.3             |
| OKU4      | Well     | 7.59       | 6.44 | 21.2 | 265   | 169.6 | 6.5 | 3.3  | 9.9             | 36.2                          | 27.9                         | 6.4                             | 43.5                          | 15.5            | 4.5            | 8.2              | 22               |
| OKU5      | Well     | 12.5       | 6.94 | 20.9 | 238   | 152.4 | 5.5 | NM   | 11.7            | 26.3                          | 22                           | 5                               | 43.5                          | 17.5            | 1.7            | 5.4              | 18.5             |
| OKU6      | Well     | 70         | 6.89 | 18.3 | 465   | 297.6 | 4.7 | 4.8  | 10.7            | 64.1                          | 57.2                         | 13                              | 62.1                          | 27.9            | 0.8            | 14.4             | 38.1             |
| OKU7      | Well     | 4.68       | 6.49 | 24.3 | 407   | 260.5 | 3.8 | 4.1  | 6.5             | 34.3                          | 13.7                         | 3.1                             | 121.6                         | 9.8             | 6.6            | 9.7              | 30.1             |
| OKU8      | Well     | 4.46       | 6.41 | 21.7 | 255   | 163.2 | 4.9 | 3    | 9.5             | 37.6                          | 28.6                         | 6.5                             | 47.1                          | 13.4            | 4.1            | 8.9              | 23.7             |
| OKU9      | Well     | 5.71       | 6.74 | 24.9 | 106.3 | 68.1  | 8.6 | 2.5  | 9               | 5.1                           | 2.1                          | 0.5                             | 55.9                          | 9.6             | 1              | 1.6              | 7.8              |
| OKU10     | Well     | 5.65       | 6.5  | 20.6 | 226   | 144.7 | 3   | 3.6  | 4.2             | 13.6                          | 10.4                         | 2.4                             | 57.7                          | 6               | 4.9            | 4.2              | 13.6             |
| OKU11     | Well     | 1.2        | 6.68 | 26.7 | 354   | 226.6 | 3.9 | 3.7  | 14.3            | 51.5                          | 54.9                         | 12.5                            | 0                             | 14.4            | 5.4            | 15.3             | BDL              |
| OKD1      | Well     | NM         | 7.32 | 20.4 | 283   | 181.2 | 1.1 | 4.9  | 9.4             | 36.3                          | 26.1                         | 5.9                             | 37.3                          | 16.3            | 4.9            | 9.5              | 24               |
| OKD2      | Well     | NM         | 7.09 | 20.6 | 418   | 267.6 | 2.8 | 4.9  | 10              | 41.2                          | 42.8                         | 9.7                             | 70.1                          | 19.3            | 0.8            | 11.2             | 27.3             |
| OKD3      | Well     | 3.72       | 7.16 | 22   | 378   | 242   | 3.8 | 2.8  | 11.1            | 38.2                          | 33.5                         | 7.6                             | 47.1                          | 16.4            | 7.1            | 10.8             | 27.9             |
| OKD4      | Well     | 4.35       | 6.4  | 20.4 | 261   | 167.1 | 4.6 | 4.6  | 8.7             | 32.6                          | 28.5                         | 6.5                             | 24.9                          | 11.7            | 4.7            | 8.5              | 21               |
| OKD5      | Well     | 6.76       | NM   | 20.7 | 248   | 158.8 | 6   | 3.5  | 10.8            | 41.6                          | 32                           | 7.3                             | 37.3                          | 15.9            | 5.2            | 9.4              | 24.8             |
| OKD6      | Well     | 6.64       | 6.89 | 18.3 | 465   | 297.6 | 4.7 | 4.1  | 10.5            | 31.1                          | 11.2                         | 2.6                             | 55.9                          | 17.4            | 2.7            | 8.4              | 17.1             |
| O-KUS     | Spring   |            | 7.21 | 19.1 | 185.7 | 118.9 | 9.2 | 3.6  | 14.7            | 22.9                          | 7.1                          | 1.7                             | 7.2                           | 21              | 2.2            | 9.8              | 24.6             |
| OG1       | Well     | 2          | 6.72 | 23.6 | 266   | 170.3 | 0.8 | 6.7  | 8.4             | 11.3                          | 3.5                          | 0.8                             | 89.8                          | 12.2            | 2              | 5                | 13.9             |
| OG2       | Well     |            | 6.72 | 28.3 | 346   | 221.5 | 4.5 | 3.5  | 15.4            | 49                            | 21.3                         | 4.9                             | 141.2                         | 27.1            | 1.9            | 19.1             | 43.3             |
| OG3       | Well     | 3          | 6.64 | 22.6 | 239   | 153   | 3.1 | 3.4  | 13.6            | 22.8                          | 11.6                         | 2.7                             | 98.7                          | 20.6            | 8              | 8.9              | 29.7             |
| OG4       | Well     | 9          | 6.4  | 22.5 | 191.7 | 122.7 | 5.3 | 2.2  | 8               | 18.1                          | 19.7                         | 4.5                             | 55.6                          | 12.9            | 5.4            | 5.7              | 20.2             |

|      |        |    |    |      |      |       |       |     |      |      |       |      |      |       |      |      |      |      |
|------|--------|----|----|------|------|-------|-------|-----|------|------|-------|------|------|-------|------|------|------|------|
| OG5  | Well   |    | 5  | 6.53 | 20.4 | 229   | 146.6 | 2.3 | 2.2  | 11.8 | 39.5  | 13.5 | 3.1  | 55.2  | 20.1 | 3.6  | 9.1  | 21.3 |
| OG6  | Well   |    |    | 6.74 | 24.6 | 479   | 306.6 | 2.9 | 1.7  | 37.5 | 34.1  | 26.5 | 6    | 150.2 | 28.1 | 1.9  | 15.3 | 39.4 |
| OG7  | Well   |    | 5  | 6.52 | 19.2 | 373   | 238.8 | 4.9 | 3.2  | 13   | 47    | 48.8 | 11.1 | 75.7  | 18.6 | 0.7  | 13.9 | 29.1 |
| OG8  | Tap    | NM |    | 7.16 | 22.8 | 164.9 | 105.6 | 9.1 | 3.2  | 5.3  | 19.8  | 13.3 | 3.1  | 34    | 9.4  | 1    | 4.9  | 13.5 |
| OG9  | Well   |    | 4  | 6.34 | 22.4 | 237   | 151.7 | 3.4 | 7    | 9.7  | 14.2  | 22.1 | 5    | 51.3  | 9.5  | 4.8  | 5.1  | 14.2 |
| OG10 | Well   |    | 4  | 6.27 | 21   | 301   | 192.7 | 1.1 | 2.9  | 8.4  | 19.2  | 12.3 | 2.8  | 107   | 21.2 | 8.8  | 8    | BDL  |
| OG11 | Well   |    | 5  | 6.19 | 19.6 | 453   | 290   | 2.8 | 4.4  | 17.9 | 145.1 | 66.4 | 15.1 | 54.1  | 57.6 | 2.2  | 22.2 | 42.8 |
| OG12 | Well   |    | 7  | 6.22 | 20.9 | 354   | 226.6 | 2.3 | 3    | 18.3 | 58.4  | 31.9 | 7.3  | 70.4  | 22.6 | 2.7  | 14.3 | 32.4 |
| OG13 | Well   |    | 6  | 6.44 | 23.1 | 378   | 242   | 1.7 | 4.8  | 14.6 | 84.3  | 19.2 | 4.4  | 82.3  | 15.8 | 7.2  | 11   | 48.1 |
| OG14 | Well   |    | 4  | 6.44 | 21.4 | 285   | 182.4 | 3.2 | 5    | 13.8 | 22.2  | 33.4 | 7.6  | 69    | 16.8 | 10.5 | 7.4  | 29.6 |
| OG15 | Well   |    | 4  | 6.57 | 22.6 | 269   | 172.2 | 3.2 | 4    | 7.9  | 14.6  | 16.1 | 3.7  | 105.1 | 11.1 | 5.5  | 5.4  | 24.5 |
| OG16 | Well   |    | 5  | 6.94 | 21.3 | 317   | 202.9 | 1.6 | 3.1  | 12   | 10.1  | 7.4  | 1.7  | 143.6 | 22.2 | 3.2  | 7.3  | BDL  |
| OG17 | Well   |    | 2  | 7.08 | 20.6 | 340   | 217.6 | 8.2 | 4.1  | 5.1  | 46.4  | 28.5 | 6.5  | 78.9  | 15.3 | 0.7  | 11.4 | 27   |
| OG18 | Well   |    | 6  | 6.34 | 21.3 | 236   | 151.1 | 3.3 | 5.9  | 9.2  | 21.5  | 23.5 | 5.4  | 70.7  | 14.7 | 10.2 | 7.5  | 26.4 |
| OG19 | Well   | NM |    | 6.27 | 21.6 | 323   | 206.8 | 1.1 | 3.3  | 21.3 | BDL   | 19.6 | 4.5  | 89.7  | 21.5 | 0.3  | 13.6 | 8.8  |
| OG20 | Well   |    | 5  | 6.89 | 23.5 | 318   | 203.6 | 1.7 | 4.9  | 10.9 | 26.4  | 11.2 | 2.6  | 133.2 | 19.3 | 6.1  | 7.8  | BDL  |
| OG21 | Well   |    | 5  | 6.5  | 22.7 | 410   | 262.4 | 1.7 | 2.5  | 12   | 27    | 28   | 6.4  | 83.4  | 12.4 | 1.4  | 6.5  | BDL  |
| OG22 | Spring |    |    | 7.45 | 23.6 | 217   | 138.9 | 7.7 | 0    | 10.9 | 22.9  | 13.7 | 3.1  | 9.3   | 0    | 8.4  | 25.8 | BDL  |
| OG23 | Spring |    |    | 7.45 | 17.6 | 133   | 85.2  | 9.5 | 3.5  | 4.6  | 4.5   | 2.7  | 0.7  | 4     | 5.5  | 3.2  | 1.4  | 4.6  |
| OG24 | Well   |    | 5  | 6.83 | 22.2 | 331   | 211.9 | 3.6 | 2.8  | 13.7 | 71.4  | 41.9 | 9.5  | 8.9   | 21.5 | 4.7  | 16.8 | 45   |
| OG25 | Well   |    | 10 | 6.95 | 22.7 | 333   | 213.2 | 2.4 | 2.8  | 4.1  | 45    | 18.9 | 4.3  | 9.1   | 10.2 | 0.8  | 6.5  | 28.9 |
| OG26 | Well   |    | 4  | 6.74 | 21.6 | 210   | 134.4 | 7.5 | -3.7 | 5.9  | 35.2  | 24.3 | 5.5  | 4.5   | 12   | 1.9  | 8.5  | 23.6 |
| OG27 | Well   |    | 5  | 6.58 | 23.3 | 324   | 207.4 | 3.4 | 2.5  | 11   | 74.2  | 12.5 | 2.9  | 12.8  | 22   | 4.8  | 22.1 | 50.8 |
| OG28 | Well   |    | 6  | 8.44 | 22.8 | 291   | 186.3 | 4.1 | 3.6  | 11.3 | 24.3  | 24.3 | 5.5  | 11.4  | 16.6 | 4.3  | 7.6  | 35.1 |
| OG29 | Well   | NM |    | 6.41 | 22.9 | 266   | 170.3 | 1.8 | 2.4  | 9.7  | 28.8  | 14.2 | 3.3  | 7     | 14.6 | 6.3  | 7.3  | BDL  |
| OG30 | Well   |    | 4  | 6.76 | 21.8 | 347   | 222.1 | 2.1 | 3.6  | 6.6  | 21.7  | 10.1 | 2.3  | 10.5  | 12.4 | 2.7  | 5.7  | 18.7 |
| OG31 | Well   |    | 3  | 6.81 | 22.1 | 368   | 235.6 | 1.6 | 1.8  | 12.8 | 36.7  | 3.7  | 0.9  | 14    | 27.1 | 5.1  | 9.9  | BDL  |
| OG32 | Well   |    | 3  | 7.1  | 21.9 | 275   | 176   | 8.1 | 2.2  | 6.4  | 22.9  | 21   | 4.8  | 8.5   | 11   | 4.3  | 5.9  | 23.3 |

Table S2: Correlation matrix of physiochemical data of groundwater samples collected from Kubi and Ocho village

| Kubi village (n=19)             |                                 |                 |                               |                 |                |                  |                  |       |     |
|---------------------------------|---------------------------------|-----------------|-------------------------------|-----------------|----------------|------------------|------------------|-------|-----|
|                                 | NO <sub>3</sub> <sup>-</sup> -N | Cl <sup>-</sup> | SO <sub>4</sub> <sup>2-</sup> | Na <sup>+</sup> | K <sup>+</sup> | Mg <sup>2+</sup> | Ca <sup>2+</sup> | EC    | DOC |
| NO <sub>3</sub> <sup>-</sup> -N |                                 |                 |                               |                 |                |                  |                  |       |     |
| Cl <sup>-</sup>                 | 0.17                            |                 |                               |                 |                |                  |                  |       |     |
| SO <sub>4</sub> <sup>2-</sup>   | .88**                           | 0.15            |                               |                 |                |                  |                  |       |     |
| Na <sup>+</sup>                 | .68**                           | .67**           | .66**                         |                 |                |                  |                  |       |     |
| K <sup>+</sup>                  | -0.18                           | -0.14           | -0.45                         |                 |                |                  |                  |       |     |
| Mg <sup>2+</sup>                | .84**                           | 0.38            | .93**                         | .77**           | -0.12          |                  |                  |       |     |
| Ca <sup>2+</sup>                | .80**                           | 0.35            | .85**                         | .74**           | -0.02          | .94**            |                  |       |     |
| EC                              | .63**                           | 0.11            | .66**                         | .60**           | -0.07          | .73**            | .71**            |       |     |
| DOC                             | 0.37                            | -0.28           | 0.29                          | -0.02           | -0.04          | 0.21             | 0.1              | 0.16  |     |
| Ocho village (n=23)             |                                 |                 |                               |                 |                |                  |                  |       |     |
| NO <sub>3</sub> <sup>-</sup> -N |                                 |                 |                               |                 |                |                  |                  |       |     |
| Cl <sup>-</sup>                 | 0.38                            |                 |                               |                 |                |                  |                  |       |     |
| SO <sub>4</sub> <sup>2-</sup>   | .69**                           | 0.33            |                               |                 |                |                  |                  |       |     |
| Na <sup>+</sup>                 | .72**                           | .59**           | .82**                         |                 |                |                  |                  |       |     |
| K <sup>+</sup>                  | -0.08                           | 0.00            | -0.16                         | -0.12           |                |                  |                  |       |     |
| Mg <sup>2+</sup>                | .60**                           | .56**           | .82**                         | .80**           | -0.18          |                  |                  |       |     |
| Ca <sup>2+</sup>                | .48*                            | .54**           | .74**                         | .62**           | 0.12           | .85**            |                  |       |     |
| EC                              | .60**                           | .67**           | .67**                         | .66**           | -0.27          | .72**            | .72**            |       |     |
| DOC                             | -0.03                           | -0.23           | -0.12                         | -0.12           | 0.32           | -0.26            | -0.25            | -0.16 |     |

\*Correlations significant at p = 0.05

\*\*Correlation significant at p = 0.01

Table S3: Isotopic data (‰) of sampled groundwater in Kubi and Ocho village

| Kubi village |          |                                                |                                                | Ocho village |      |                                                |                                                |
|--------------|----------|------------------------------------------------|------------------------------------------------|--------------|------|------------------------------------------------|------------------------------------------------|
| Sample       | Type     | δ <sup>15</sup> N-NO <sub>3</sub> <sup>-</sup> | δ <sup>18</sup> O-NO <sub>3</sub> <sup>-</sup> | Sample       | Type | δ <sup>15</sup> N-NO <sub>3</sub> <sup>-</sup> | δ <sup>18</sup> O-NO <sub>3</sub> <sup>-</sup> |
| OKR1         | River    | 7.2                                            | 2.1                                            | OG4          | Well | 9.9                                            | 2.6                                            |
| OK BH        | Borehole | 6.5                                            | 1.2                                            | OG6          | Well | 26                                             | 14.9                                           |
| OKU2         | Well     | 3.7                                            | 2.4                                            | OG7          | Well | 6.6                                            | 1                                              |
| OKU3         | Well     | 5.1                                            | 0.8                                            | OG11         | Well | 8.6                                            | 2.6                                            |
| OKU5         | Well     | 13.3                                           | 2.2                                            | OG14         | Well | 15.2                                           | 3.3                                            |
| OKU6         | Well     | 6.8                                            | 1.4                                            | OG17         | Well | 5.2                                            | 0.7                                            |
| OKU11        | Well     | 5.3                                            | -1                                             | OG21         | Well | 14.5                                           | 14.7                                           |
| OKD2         | Well     | 6.8                                            | 2.8                                            | OG24         | Well | 12                                             | 7.7                                            |
| OKD4         | Well     | 6.5                                            | 1.4                                            | OG26         | Well | 4.9                                            | 0.1                                            |
| OKD5         | Well     | 6.1                                            | 1.6                                            | Min          |      | 4.9                                            | 0.1                                            |
| Min          |          | 3.7                                            | -1                                             | Max          |      | 26                                             | 14.9                                           |
| Max          |          | 13.3                                           | 2.8                                            | Mean         |      | 11.4                                           | 5.3                                            |
| Mean         |          | 6.7                                            | 1.5                                            | STDev        |      | 6.7                                            | 5.9                                            |
| STDEV        |          | 2.6                                            | 1.1                                            |              |      |                                                |                                                |

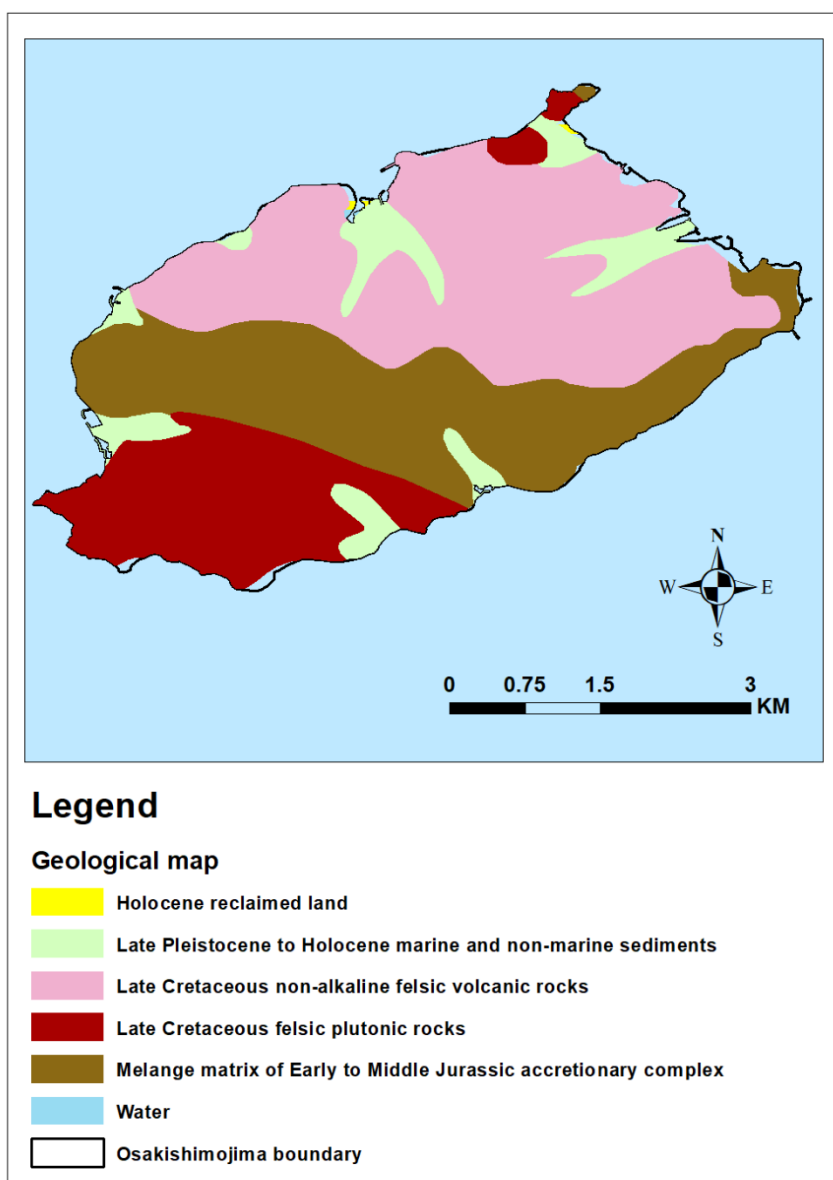

Figure S1: Outcrop geology of Osakishimojima Island
